# Supplementary material
Source: PubMed Central journal article supplement (PMC2586263)
Supplement: M805927200_1.pdf [file M805927200_1.pdf]

**Table: S1 Genotyping Primers**

| Allele                          | Forward Primer (5'-3')          | Reverse Primer (5'-3')        |
|---------------------------------|---------------------------------|-------------------------------|
| <i>HIF 1<math>\alpha</math></i> | GCA GTT AAG AGC ACT AGT TG      | GGA GCT ATC TCT CTA GAC C     |
| <i>Cre</i> Transgene            | TGC CAC GAC CAA GTG ACA GCA ATG | AGA GAC GGA AAT CCA TCG CTC G |
| <i>rtTA</i> transgene           | GAC ACA TAT AAG ACC CTG GTC A   | AAA ATC TTG CCA GCT TTC CCC   |

**Table: S2 – Quantitative Real Time PCR Primers**

| <b>Gene</b>                                                             | <b>Forward Primer (5'-3')</b> | <b>Reverse Primer (5'-3')</b> |
|-------------------------------------------------------------------------|-------------------------------|-------------------------------|
| <i>SPA</i>                                                              | GCT GTC AGT GGG GGA TAA AG    | CTT TGT AAT GCT TGC GAT GG    |
| <i>SPB</i>                                                              | CTT GTC CTC CGA TGT TCC AC    | GGC CTG GTT GAT CAC AGA CT    |
| <i>SPC</i>                                                              | CAG CTC CAG GAA CCT ACT GC    | GCT TAG AGG TGG GTG TGG AG    |
| <i>SPD</i>                                                              | GAG GTT GCC TTC TCC CAC TA    | AGC CTG TTT GCA CAT CTC CT    |
| <i>HIF1-<math>\alpha</math></i>                                         | TGGCTCCCTATATCCCAATG          | GGTCTGCTGGAACCCAGTAA          |
| <i>HIF2-<math>\alpha</math></i>                                         | GAGCAAGCCTTCCAAGACAC          | TTCGCACTGATGGTCTTGTC          |
| <i>Beta-catenin</i>                                                     | GGC AGC AGC AGT CTT ACT TG    | AAG GAC TGG GAA AAG CCT TG    |
| <i>VEGF</i>                                                             | TCA CCA AAG CCA GCA CAT AG    | AAT GCT TTC TCC GCT CTG AA    |
| <i>CCSP</i>                                                             | CAT CAT GAA GCT CAC GGA GA    | GAG ACA CAG GGC AGT GAC AA    |
| forkhead box A2 ( <i>Foxa2</i> )                                        | GCC AGC GAG TTA AAG TAT GC    | TCA TGT TGC TCA CGG AAG AG    |
| <i>HNF 3-<math>\alpha</math></i> (Forkhead box protein A1)              | CCC TTT CTC CCT TTC ACT CC    | GTG GTG GGC CTA ACA ACA AC    |
| Thyroid transcription factor 1 ( <i>Ttf1</i> )                          | GCT GGC CTT TCA GAA AAT TG    | GGA CTA GGG ACT GGG ACT GG    |
| CCAAT/enhancer binding protein (C/EBP), alpha ( <i>CEBPa</i> )          | GCA AGC CAG GAC TAG GAG AT    | CGG AAA GTC TCT CGG TCT CA    |
| Hypoxanthine guanine phosphoribosyl transferase 1                       | AAGCCTAAGATGAGCGCAAG          | TTACTAGGCAGATGGCCACA          |
| peptidylprolyl isomerase A (cyclophilin A)                              | AGC ATA CAG GTC CTG GCA TC    | TTC ACC TTC CCA AAG ACC AC    |
| <i>ABCA3</i> ATP-binding cassette, sub-family A ( <i>ABC1</i> member 3) | GAG CTT TGC CCA CCT ACA AC    | GAA ACT GGG AGG GAG AGG AC    |
| GATA binding protein 6 ( <i>Gata6</i> )                                 | CAA AAG CTT GCT CCG GTA AC    | CTG AGG TGG TCG CTT GTG TA    |
| <i>HIMF</i> (resistin like alpha ( <i>Retnla</i> ))                     | TAT GAA CAG ATG GGC CTC CT    | GGT CCA GTC AAC GAG TAA GCA   |
